# Supplementary material
Source: ML conference proceedings conference paper supplement (https://proceedings.mlr.press/v32/ahn14.html)
Supplement: Supplementary file 1 [file ahn14-supp.pdf]

---

# Supplementary Material: Distributed Stochastic Gradient MCMC

---

**Sungjin Ahn**

Department of Computer Science, University of California, Irvine

SUNGJIA@ICS.UCI.EDU

**Babak Shahbaba**

Department of Statistics, University of California, Irvine

BABAOKS@UCI.EDU

**Max Welling**

Machine Learning Group, University of Amsterdam

M.WELLING@UVA.NL

## 1. Valid SGLD Estimators

**Definition 1.** An estimator  $f(\theta, Z; X)$ , where  $Z$  is a set of auxiliary random variables associated with the estimator, is said to be a *valid SGLD estimator* if  $\mathbb{E}_Z[f(\theta, Z; X)] = \bar{g}(\theta; X)$ , where  $\mathbb{E}_Z$  denotes expectation w.r.t. the distribution  $p(Z; X)$  and it has finite variance  $\mathbb{V}_Z[f(\theta, Z; X)] < \infty$ .

**Proposition 1.1.** For each shard  $s = 1, \dots, S$ , given shard size,  $N_s$ , and the normalized shard selection frequency,  $q_s$ , such that  $N_s > 0$ ,  $\sum_{s=1}^S N_s = N$ ,  $q_s \in (0, 1)$ , and  $\sum_{s=1}^S q_s = 1$ , the following estimator is a valid SGLD estimator,

$$\bar{g}_d(\theta; X_s^n) \stackrel{\text{def}}{=} \frac{N_s}{Nq_s} \bar{g}(\theta; X_s^n) \quad (1)$$

where shard  $s$  is sampled by a scheduler  $h(\mathcal{Q})$  with frequencies  $\mathcal{Q} = \{q_1, \dots, q_S\}$ .

*Proof.* We first decompose the expectation of the estimator  $\mathbb{E}[\bar{g}_d(\theta; X_s^n)|X]$  w.r.t. (1) the shard  $s$  and (2) the minibatch  $X_s^n$  conditioned on the shard  $s$ , as follows

$$\mathbb{E}[\bar{g}_d(\theta; X_s^n)|X] = \mathbb{E}_s[\mathbb{E}_{X_s^n}[\bar{g}_d(\theta; X_s^n)|s]|X]. \quad (2)$$

Then, plugging Eqn. (1) in Eqn. (2) and rearranging, we obtain

$$\begin{aligned} &= \mathbb{E}_s \left[ \mathbb{E}_{X_s^n} \left[ \frac{N_s}{nNq_s} \sum_{x \in X_s^n} g(\theta; x) \middle| s \right] \middle| X \right] \\ &= \mathbb{E}_s \left[ \frac{N_s}{Nq_s} \mathbb{E}_{X_s^n} \left[ \frac{1}{n} \sum_{x \in X_s^n} g(\theta; x) \middle| s \right] \middle| X \right]. \end{aligned} \quad (3)$$

Note here that given  $X$ , the inner expectation w.r.t. the minibatches of shard  $s$ ,  $X_s^n$ , is equal to the mean

score over the shard  $X_s$ . That is,

$$\mathbb{E}_{X_s^n} \left[ \frac{1}{n} \sum_{x \in X_s^n} g(\theta; x) \middle| s, X \right] = \frac{1}{N_s} \sum_{x \in X_s} g(\theta; x). \quad (4)$$

Substituting this for the inner expectation, in Eqn. (3), we have

$$\mathbb{E}_s \left[ \frac{N_s}{Nq_s} \frac{1}{N_s} \sum_{x \in X_s} g(\theta; x) \right] \quad (5)$$

$$= \frac{1}{N} \mathbb{E}_s \left[ \frac{1}{q_s} \sum_{x \in X_s} g(\theta; x) \right] \quad (6)$$

$$= \frac{1}{N} \sum_{s=1}^S p(s) \frac{1}{q_s} \sum_{x \in X_s} g(\theta; x). \quad (7)$$

Because we choose a shard  $s$  by  $h(\mathcal{Q})$ ,  $p(s)$  is equal to  $q_s$ . Thus, by plugging  $p(s) = q_s$  in Eqn. (7) and rearranging, we obtain

$$\begin{aligned} &= \frac{1}{N} \sum_{s=1}^S q_s \frac{1}{q_s} \sum_{x \in X_s} g(\theta; x) \\ &= \frac{1}{N} \sum_{s=1}^S \sum_{x \in X_s} g(\theta; x) \\ &= \frac{1}{N} \sum_{x \in X} g(\theta; x) \\ &= \bar{g}(\theta; X). \end{aligned} \quad (8)$$

which completes the proof for the validity of the estimator  $\bar{g}_d$ ,

$$\mathbb{E}[\bar{g}_d(\theta; X_s^n)|X] = \bar{g}(\theta; X). \quad (9)$$

□

**Corollary 1.2.** *A trajectory sampler with a finite  $\tau \geq 1$ , obtained by redefining the worker (shard) selection process  $h(\mathcal{Q})$  in Proposition 1.1 by the process  $h(\mathcal{Q}, \tau)$  below, is a valid SGLD sampler.  $h(\mathcal{Q}, \tau)$ : for chain  $c$  at iteration  $t$ , choose the next worker  $s_{t+1}^c$  by*

$$s_{t+1}^c = \begin{cases} \tilde{h}(\mathcal{Q}), & \text{if } t = k\tau \text{ for } k = 0, 1, 2, \dots \\ s_t^c, & \text{otherwise,} \end{cases} \quad (10)$$

where  $\tilde{h}(\mathcal{Q})$  is an arbitrary scheduler with selection probabilities  $\mathcal{Q}$ .

*Proof.* Because the trajectory lengths are all equal to  $\tau$  for all workers  $s = 1, \dots, S$  and  $\tilde{h}(\mathcal{Q})$  conforms to the frequencies  $\mathcal{Q}$ , the worker (shard) selection frequencies of the trajectory sampling process  $h(\mathcal{Q}, \tau)$  also satisfies  $\mathcal{Q}$ . As a result, in the proof of Proposition 1.1, the probability  $p(s) = q_s$  is retained even if we replace  $h(\mathcal{Q})$  in Proposition 1.1 by  $h(\mathcal{Q}, \tau)$ . Because changing the worker selection process only affects  $p(s)$  in the proof of Proposition 1.1, the proof directly applies to the corollary.  $\square$

**Corollary 1.3.** *Given  $\tau_s$ , where  $1 \leq \tau_s < \infty$  for  $s = 1, \dots, S$ , the adaptive trajectory sampler, obtained by redefining the worker (shard) selection process  $h(\mathcal{Q})$  in Proposition 1.1 by the process  $h(\mathcal{Q}, \{\tau_s\})$  below, is a valid SGLD sampler.  $h(\mathcal{Q}, \{\tau_s\})$ : for chain  $c$  at iteration  $t$ , choose the next worker  $s_{t+1}^c$  by*

$$s_{t+1}^c = \begin{cases} \tilde{h}(1/S), & \text{if } t = k\tau_{s_t^c} \text{ for } k = 0, 1, 2, \dots \\ s_t^c, & \text{otherwise,} \end{cases} \quad (11)$$

where  $\tilde{h}(1/S)$  is a scheduler with uniform selection probabilities.

*Proof.* Because we select the worker uniformly by  $\tilde{h}(1/S)$ , only the trajectory lengths  $\{\tau_{s^1}, \dots, \tau_{s^c}\}$  affect the shard selection frequency of the process  $h(\mathcal{Q}, \{\tau_s\})$ . Since the trajectory length  $\tau_s$  is proportional to  $q_s$  ( $\tau_s \stackrel{\text{def}}{=} \bar{\tau} S q_s$ ), taking  $\tau_s$  consecutive updates for uniformly selected random worker  $s$  satisfies the frequency  $\mathcal{Q}$ . Therefore, the proof of Proposition 1.1 also directly applies to the corollary.  $\square$
